# Supplementary material
Source: publisher figshare collection journal article supplement (https://karger.figshare.com/ndownloader/files/13851347)
Supplement: Supplementary file 1 [file 13851347]

## **Supplementary Material**

# **Building a Competing Endogenous RNA Network to Find Potential Long Non-Coding RNA Biomarkers for Pheochromocytoma**

Ying-Chun Liang   Yu-Peng Wu   Dong-Ning Chen   Shao-Hao Chen  
Xiao-Dong Li   Xiong-Lin Sun   Yong Wei   Xu Ning   Xue-Yi Xue

Department of Urology, First Affiliated Hospital of Fujian Medical University, China/

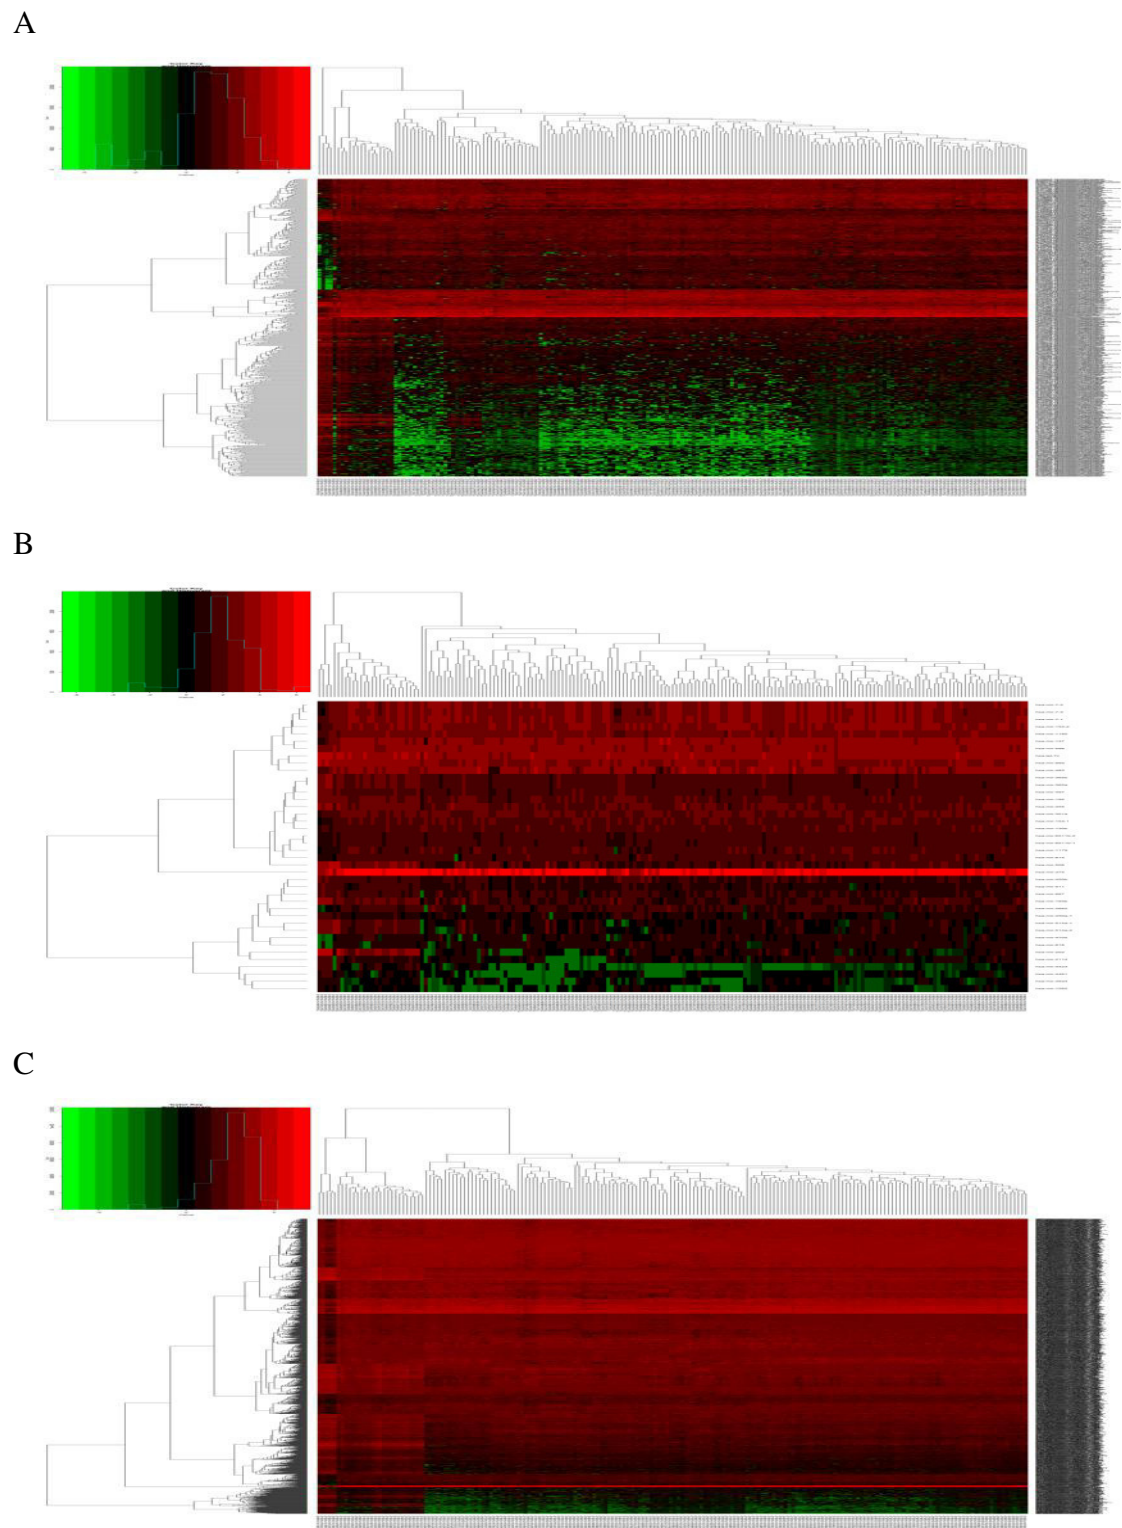

Supplementary Fig. 1 Heat-maps for the expression of different RNAs in PCC. (A) differentially expressed long non-coding RNAs (lncRNAs); (B) microRNAs (miRNAs); and (C) mRNAs.
